# Supplementary material for: Identification of Genomic Regions for Traits Associated with Flowering in Cassava (Manihot esculenta Crantz)
Source: MDPI journal article supplement (doi:10.3390/plants13060796), 2024-03-12
Supplement: s1 [file s1]

| Female       | Male         | Accession    | Cluster |
|--------------|--------------|--------------|---------|
| UG15F088P005 | UG15F271P008 | UG16F002P001 | 1       |
| UG15F088P005 | UG15F271P008 | UG16F002P004 | 1       |
| UG15F196P020 | UG15F088P006 | UG16F004P004 | 1       |
| UG15F088P005 | UG15F088P005 | UG16F006P001 | 1       |
| UG15F116P007 | UG15F168P009 | UG16F059P001 | 1       |
| UG15F088P005 | UG15F088P005 | UG16F060P001 | 1       |
| UG15F117P006 | UG15F196P007 | UG16F061P003 | 1       |
| UG15F088P005 | UG15F119P001 | UG16F062P001 | 1       |
| UG15F258P004 | UG15F203P005 | UG16F063P002 | 1       |
| UG15F168P001 | UG15F203P005 | UG16F065P002 | 1       |
| UG15F127P004 | UG15F127P004 | UG16F066P001 | 1       |
| UG15F088P006 | UG15F117P012 | UG16F074P004 | 1       |
| UG15F276P001 | UG15F271P008 | UG16F075P004 | 1       |
| UG15F306P011 | UG15F047P002 | UG16F076P001 | 1       |
| UG15F088P005 | UG15F185P004 | UG16F077P001 | 1       |
| UG15F168P001 | UG15F117P012 | UG16F078P001 | 1       |
| UG15F258P004 | UG15F306P034 | UG16F083P003 | 1       |
| UG15F168P001 | UG15F118P008 | UG16F084P001 | 1       |
| UG15F193P010 | UG15F235P007 | UG16F098P001 | 1       |
| UG15F088P003 | UG15F258P004 | UG16F100P002 | 1       |
| UG15F088P002 | UG15F118P008 | UG16F109P001 | 1       |
| UG15F251P008 | UG15F088P009 | UG16F115P001 | 1       |
| UG15F088P006 | UG15F258P004 | UG16F117P001 | 1       |
| UG15F088P009 | UG15F203P005 | UG16F127P005 | 1       |
| UG15F185P004 | UG15F185P004 | UG16F142P002 | 1       |
| UG15F047P004 | UG15F291P001 | UG16F151P001 | 1       |
| UG15F196P020 | UG15F168P001 | UG16F152P001 | 1       |
| UG15F047P004 | UG15F233P011 | UG16F155P003 | 1       |
| UG15F185P004 | UG15F235P007 | UG16F174P002 | 1       |
| UG15F088P003 | unknown      | UG16F183P015 | 1       |
| UG15F088P003 | unknown      | UG16F183P041 | 1       |
| UG15F088P006 | UG15F117P009 | UG16F184P006 | 1       |
| UG15F088P006 | UG15F117P009 | UG16F184P008 | 1       |
| UG15F271P008 | UG15F087P505 | UG16F186P006 | 1       |
| UG15F008P006 | UG15F117P001 | UG16F190P007 | 1       |
| UG15F087P001 | UG15F168P009 | UG16F191P002 | 1       |
| UG15F087P016 | UG15F271P008 | UG16F192P001 | 1       |
| UG15F087P016 | UG15F271P008 | UG16F192P004 | 1       |
| UG15F087P505 | UG15F087P016 | UG16F193P004 | 1       |
| UG15F088P006 | UG15F117P001 | UG16F195P005 | 1       |
| UG15F088P006 | UG15F153P001 | UG16F199P001 | 1       |
| UG15F087P016 | UG15F291P001 | UG16F203P005 | 1       |
| UG15F276P015 | UG15F088P006 | UG16F205P001 | 1       |
| UG15F271P008 | UG15F088P006 | UG16F207P002 | 1       |
| UG15F271P008 | UG15F088P006 | UG16F207P005 | 1       |
| UG15F087P001 | UG15F168P009 | UG16F208P001 | 1       |

|              |              |              |   |
|--------------|--------------|--------------|---|
| UG15F087P505 | UG15F087P016 | UG16F211P003 | 1 |
| UG15F156P518 | unknown      | UG16F291P001 | 1 |
| UG15F156P518 | unknown      | UG16F291P014 | 1 |
| UG15F271P008 | unknown      | UG16F292P023 | 1 |
| UG15F271P008 | unknown      | UG16F292P230 | 1 |
| UG15F271P008 | unknown      | UG16F292P243 | 1 |
| UG15F088P005 | unknown      | UG16F293P013 | 1 |
| UG15F088P005 | unknown      | UG16F293P027 | 1 |
| UG15F088P005 | unknown      | UG16F293P067 | 1 |
| UG15F088P005 | unknown      | UG16F293P081 | 1 |
| UG15F088P005 | unknown      | UG16F293P092 | 1 |
| UG15F088P005 | unknown      | UG16F293P102 | 1 |
| UG15F088P005 | unknown      | UG16F293P126 | 1 |
| UG15F088P005 | unknown      | UG16F293P137 | 1 |
| UG15F088P005 | unknown      | UG16F293P145 | 1 |
| UG15F088P005 | unknown      | UG16F293P181 | 1 |
| UG15F088P005 | unknown      | UG16F293P183 | 1 |
| UG15F088P005 | unknown      | UG16F293P191 | 1 |
| UG15F088P005 | unknown      | UG16F293P201 | 1 |
| UG15F276P015 | unknown      | UG16F294P003 | 1 |
| UG15F276P015 | unknown      | UG16F294P016 | 1 |
| UG15F276P015 | unknown      | UG16F294P036 | 1 |
| UG15F276P015 | unknown      | UG16F294P081 | 1 |
| UG15F276P015 | unknown      | UG16F294P083 | 1 |
| UG15F276P015 | unknown      | UG16F294P083 | 1 |
| UG15F276P015 | unknown      | UG16F294P086 | 1 |
| UG15F276P015 | unknown      | UG16F294P095 | 1 |
| UG15F185P004 | unknown      | UG16F295P056 | 1 |
| UG15F158P009 | unknown      | UG16F296P008 | 1 |
| UG15F158P009 | unknown      | UG16F296P022 | 1 |
| UG15F158P009 | unknown      | UG16F296P025 | 1 |
| UG15F158P009 | unknown      | UG16F296P211 | 1 |
| UG15F237P003 | unknown      | UG16F300P043 | 1 |
| UG15F237P003 | unknown      | UG16F300P056 | 1 |
| UG15F237P003 | unknown      | UG16F300P062 | 1 |
| UG15F153P001 | unknown      | UG16F301P009 | 1 |
| UG15F153P001 | unknown      | UG16F301P020 | 1 |
| UG15F153P001 | unknown      | UG16F301P023 | 1 |
| UG15F088P009 | unknown      | UG16F306P001 | 1 |
| UG15F116P007 | unknown      | UG16F307P008 | 1 |
| UG15F116P007 | unknown      | UG16F307P021 | 1 |
| UG15F116P007 | unknown      | UG16F307P026 | 1 |
| UG15F235P007 | unknown      | UG16F308P091 | 1 |
| UG15F088P002 | unknown      | UG16F310P003 | 1 |
| UG15F087P016 | unknown      | UG16F312P024 | 1 |
| UG15F087P016 | unknown      | UG16F312P028 | 1 |
| UG15F120P003 | unknown      | UG16F313P004 | 1 |

|              |              |              |   |
|--------------|--------------|--------------|---|
| UG15F120P003 | unknown      | UG16F313P005 | 1 |
| UG15F120P003 | unknown      | UG16F313P006 | 1 |
| UG15F120P003 | unknown      | UG16F313P013 | 1 |
| UG15F120P003 | unknown      | UG16F313P024 | 1 |
| UG15F120P003 | unknown      | UG16F313P034 | 1 |
| UG15F120P003 | unknown      | UG16F313P044 | 1 |
| UG15F120P003 | unknown      | UG16F313P068 | 1 |
| UG15F120P003 | unknown      | UG16F313P075 | 1 |
| UG15F087P001 | unknown      | UG16F314P034 | 1 |
| UG15F087P001 | unknown      | UG16F314P041 | 1 |
| UG15F087P001 | unknown      | UG16F314P042 | 1 |
| UG15F087P001 | unknown      | UG16F314P045 | 1 |
| UG15F087P001 | unknown      | UG16F314P046 | 1 |
| UG15F168P009 | unknown      | UG16F318P003 | 1 |
| UG15F168P009 | unknown      | UG16F318P004 | 1 |
| UG15F168P009 | unknown      | UG16F318P006 | 1 |
| UG15F168P009 | unknown      | UG16F318P014 | 1 |
| UG15F168P009 | unknown      | UG16F318P024 | 1 |
| UG15F253P003 | unknown      | UG16F319P004 | 1 |
| UG15F253P003 | unknown      | UG16F319P007 | 1 |
| UG15F253P003 | unknown      | UG16F319P017 | 1 |
| UG15F047P004 | unknown      | UG16F320P003 | 1 |
| UG15F047P004 | unknown      | UG16F320P008 | 1 |
| UG15F047P004 | unknown      | UG16F320P012 | 1 |
| UG15F047P004 | unknown      | UG16F320P032 | 1 |
| UG15F196P020 | UG15F088P006 | UG16F004P001 | 2 |
| UG15F196P020 | UG15F088P006 | UG16F004P014 | 2 |
| UG15F185P004 | UG15F306P034 | UG16F005P002 | 2 |
| UG15F185P004 | UG15F306P034 | UG16F005P014 | 2 |
| UG15F306P011 | UG15F203P005 | UG16F039P020 | 2 |
| UG15F306P011 | UG15F047P002 | UG16F042P002 | 2 |
| UG15F117P006 | UG15F203P005 | UG16F046P007 | 2 |
| UG15F306P034 | UG15F233P011 | UG16F052P001 | 2 |
| UG15F119P001 | UG15F168P001 | UG16F055P001 | 2 |
| UG15F119P001 | UG15F168P001 | UG16F055P002 | 2 |
| UG15F117P006 | UG15F074P001 | UG16F056P004 | 2 |
| UG15F306P011 | UG15F185P004 | UG16F057P005 | 2 |
| UG15F306P011 | UG15F306P011 | UG16F064P002 | 2 |
| UG15F306P011 | UG15F271P006 | UG16F070P003 | 2 |
| UG15F251P006 | UG15F203P005 | UG16F073P002 | 2 |
| UG15F117P012 | UG15F203P005 | UG16F081P004 | 2 |
| UG15F271P008 | UG15F250P006 | UG16F086P004 | 2 |
| UG15F116P007 | UG15F271P008 | UG16F088P001 | 2 |
| UG15F258P004 | UG15F015P029 | UG16F097P001 | 2 |
| UG15F119P001 | UG15F291P001 | UG16F112P001 | 2 |
| UG15F250P006 | UG15F258P004 | UG16F118P001 | 2 |
| UG15F236P003 | UG15F096P002 | UG16F119P001 | 2 |

|              |              |              |   |
|--------------|--------------|--------------|---|
| UG15F118P018 | UG15F203P005 | UG16F126P001 | 2 |
| UG15F185P004 | UG15F096P004 | UG16F134P002 | 2 |
| UG15F185P004 | UG15F258P004 | UG16F135P001 | 2 |
| UG15F196P020 | UG15F168P001 | UG16F138P005 | 2 |
| UG15F196P020 | UG15F100P004 | UG16F140P001 | 2 |
| UG15F047P004 | UG15F306P034 | UG16F141P001 | 2 |
| UG15F271P008 | UG15F088P006 | UG16F145P002 | 2 |
| UG15F196P020 | UG15F250P006 | UG16F147P001 | 2 |
| UG15F196P020 | UG15F250P006 | UG16F147P002 | 2 |
| UG15F196P020 | UG15F185P004 | UG16F148P001 | 2 |
| UG15F196P020 | UG15F196P007 | UG16F150P001 | 2 |
| UG15F196P020 | UG15F196P020 | UG16F150P021 | 2 |
| UG15F185P004 | UG15F100P004 | UG16F158P005 | 2 |
| UG15F196P020 | UG15F088P006 | UG16F162P002 | 2 |
| UG15F196P020 | UG15F116P007 | UG16F163P002 | 2 |
| UG15F196P020 | UG15F203P005 | UG16F164P006 | 2 |
| UG15F185P004 | UG15F088P006 | UG16F168P001 | 2 |
| UG15F185P004 | UG15F276P014 | UG16F170P001 | 2 |
| UG15F185P004 | UG15F203P005 | UG16F182P001 | 2 |
| UG15F087P016 | UG15F271P008 | UG16F185P007 | 2 |
| UG15F271P008 | UG15F087P505 | UG16F197P002 | 2 |
| UG15F271P008 | UG15F203P005 | UG16F200P001 | 2 |
| UG15F326P001 | UG15F326P001 | UG16F201P002 | 2 |
| UG15F193P010 | UG15F235P007 | UG16F202P004 | 2 |
| UG15F236P001 | UG15F100P004 | UG16F204P003 | 2 |
| UG15F278P001 | UG15F326P001 | UG16F209P002 | 2 |
| UG15F278P001 | UG15F326P001 | UG16F209P003 | 2 |
| UG15F196P020 | UG15F088P006 | UG16F210P001 | 2 |
| UG15F196P020 | UG15F088P006 | UG16F210P002 | 2 |
| UG15F271P008 | UG15F087P015 | UG16F212P001 | 2 |
| UG15F116P007 | UG15F168P009 | UG16F213P002 | 2 |
| UG15F196P020 | unknown      | UG16F290P015 | 2 |
| UG15F196P020 | unknown      | UG16F290P061 | 2 |
| UG15F196P020 | unknown      | UG16F290P093 | 2 |
| UG15F196P020 | unknown      | UG16F290P101 | 2 |
| UG15F196P020 | unknown      | UG16F290P144 | 2 |
| UG15F196P020 | unknown      | UG16F290P181 | 2 |
| UG15F196P020 | unknown      | UG16F290P191 | 2 |
| UG15F196P020 | unknown      | UG16F290P211 | 2 |
| UG15F196P020 | unknown      | UG16F290P218 | 2 |
| UG15F196P020 | unknown      | UG16F290P236 | 2 |
| UG15F196P020 | unknown      | UG16F290P238 | 2 |
| UG15F196P020 | unknown      | UG16F290P284 | 2 |
| UG15F196P020 | unknown      | UG16F290P286 | 2 |
| UG15F196P020 | unknown      | UG16F290P294 | 2 |
| UG15F196P020 | unknown      | UG16F290P294 | 2 |
| UG15F156P518 | unknown      | UG16F291P018 | 2 |

|              |              |              |   |
|--------------|--------------|--------------|---|
| UG15F156P518 | unknown      | UG16F291P058 | 2 |
| UG15F156P518 | unknown      | UG16F291P071 | 2 |
| UG15F156P518 | unknown      | UG16F291P122 | 2 |
| UG15F156P518 | unknown      | UG16F291P132 | 2 |
| UG15F156P518 | unknown      | UG16F291P139 | 2 |
| UG15F156P518 | unknown      | UG16F291P143 | 2 |
| UG15F156P518 | unknown      | UG16F291P187 | 2 |
| UG15F156P518 | unknown      | UG16F291P222 | 2 |
| UG15F271P008 | unknown      | UG16F292P003 | 2 |
| UG15F271P008 | unknown      | UG16F292P011 | 2 |
| UG15F271P008 | unknown      | UG16F292P045 | 2 |
| UG15F271P008 | unknown      | UG16F292P208 | 2 |
| UG15F271P008 | unknown      | UG16F292P254 | 2 |
| UG15F185P004 | unknown      | UG16F295P005 | 2 |
| UG15F185P004 | unknown      | UG16F295P041 | 2 |
| UG15F185P004 | unknown      | UG16F295P047 | 2 |
| UG15F185P004 | unknown      | UG16F295P063 | 2 |
| UG15F185P004 | unknown      | UG16F295P065 | 2 |
| UG15F306P034 | unknown      | UG16F297P004 | 2 |
| UG15F117P006 | unknown      | UG16F299P005 | 2 |
| UG15F088P002 | unknown      | UG16F310P004 | 2 |
| UG15F088P002 | unknown      | UG16F310P009 | 2 |
| UG15F087P016 | unknown      | UG16F312P023 | 2 |
| UG15F087P016 | unknown      | UG16F312P026 | 2 |
| UG15F276P001 | unknown      | UG16F316P004 | 2 |
| UG15F276P001 | unknown      | UG16F316P012 | 2 |
| UG15F276P001 | unknown      | UG16F316P023 | 2 |
| UG15F168P009 | unknown      | UG16F318P013 | 2 |
| UG15F168P009 | unknown      | UG16F318P016 | 2 |
| UG15F253P003 | unknown      | UG16F319P002 | 2 |
| UG15F253P003 | unknown      | UG16F319P011 | 2 |
| UG15F253P003 | unknown      | UG16F319P026 | 2 |
| UG15F253P003 | unknown      | UG16F319P029 | 2 |
| UG15F253P003 | unknown      | UG16F319P032 | 2 |
| UG15F047P004 | unknown      | UG16F320P002 | 2 |
| UG15F047P004 | unknown      | UG16F320P017 | 2 |
| UG15F047P004 | unknown      | UG16F320P019 | 2 |
| UG15F271P008 | UG15F233P011 | UG16F001P002 | 3 |
| UG15F271P008 | UG15F233P011 | UG16F001P006 | 3 |
| UG15F271P008 | UG15F233P011 | UG16F001P014 | 3 |
| UG15F116P007 | UG15F233P011 | UG16F003P002 | 3 |
| UG15F236P006 | UG15F100P004 | UG16F043P001 | 3 |
| UG15F306P034 | UG15F117P012 | UG16F050P002 | 3 |
| UG15F088P006 | UG15F235P007 | UG16F051P002 | 3 |
| UG15F088P003 | UG15F235P007 | UG16F068P001 | 3 |
| UG15F100P004 | UG15F100P004 | UG16F080P001 | 3 |
| UG15F117P009 | UG15F233P011 | UG16F082P001 | 3 |

|              |              |              |   |
|--------------|--------------|--------------|---|
| UG15F117P009 | UG15F233P011 | UG16F082P002 | 3 |
| UG15F117P009 | UG15F233P011 | UG16F082P003 | 3 |
| UG15F088P006 | UG15F253P003 | UG16F089P002 | 3 |
| UG15F168P001 | UG15F088P006 | UG16F090P002 | 3 |
| UG15F258P004 | UG15F271P008 | UG16F091P002 | 3 |
| UG15F088P003 | UG15F235P011 | UG16F103P002 | 3 |
| UG15F117P012 | UG15F117P012 | UG16F105P002 | 3 |
| UG15F236P006 | UG15F100P004 | UG16F106P001 | 3 |
| UG15F116P007 | UG15F235P007 | UG16F108P001 | 3 |
| UG15F117P012 | UG15F235P007 | UG16F110P001 | 3 |
| UG15F088P005 | UG15F119P001 | UG16F113P001 | 3 |
| UG15F118P018 | UG15F235P007 | UG16F125P001 | 3 |
| UG15F235P007 | UG15F096P002 | UG16F133P004 | 3 |
| UG15F235P007 | UG15F096P002 | UG16F133P021 | 3 |
| UG15F235P007 | UG15F203P005 | UG16F156P004 | 3 |
| UG15F235P007 | UG15F088P006 | UG16F160P005 | 3 |
| UG15F235P007 | UG15F119P001 | UG16F161P004 | 3 |
| UG15F185P004 | UG15F271P008 | UG16F165P001 | 3 |
| UG15F185P004 | UG15F235P007 | UG16F172P012 | 3 |
| UG15F235P007 | UG15F088P003 | UG16F175P002 | 3 |
| UG15F088P003 | unknown      | UG16F183P032 | 3 |
| UG15F087P505 | UG15F235P007 | UG16F194P001 | 3 |
| UG15F235P007 | UG15F120P003 | UG16F196P002 | 3 |
| UG15F233P011 | UG15F087P016 | UG16F198P002 | 3 |
| UG15F193P010 | UG15F235P007 | UG16F202P002 | 3 |
| UG15F271P008 | unknown      | UG16F292P078 | 3 |
| UG15F237P003 | unknown      | UG16F300P009 | 3 |
| UG15F237P003 | unknown      | UG16F300P026 | 3 |
| UG15F237P003 | unknown      | UG16F300P041 | 3 |
| UG15F237P003 | unknown      | UG16F300P042 | 3 |
| UG15F237P003 | unknown      | UG16F300P046 | 3 |
| UG15F237P003 | unknown      | UG16F300P053 | 3 |
| UG15F237P003 | unknown      | UG16F300P066 | 3 |
| UG15F100P004 | unknown      | UG16F302P002 | 3 |
| UG15F100P004 | unknown      | UG16F302P021 | 3 |
| UG15F233P011 | unknown      | UG16F304P005 | 3 |
| UG15F233P011 | unknown      | UG16F304P019 | 3 |
| UG15F233P011 | unknown      | UG16F304P025 | 3 |
| UG15F233P011 | unknown      | UG16F304P032 | 3 |
| UG15F233P011 | unknown      | UG16F304P037 | 3 |
| UG15F233P011 | unknown      | UG16F304P052 | 3 |
| UG15F233P011 | unknown      | UG16F304P061 | 3 |
| UG15F233P011 | unknown      | UG16F304P092 | 3 |
| UG15F233P011 | unknown      | UG16F304P165 | 3 |
| UG15F235P007 | unknown      | UG16F305P024 | 3 |
| UG15F235P007 | unknown      | UG16F308P021 | 3 |
| UG15F235P007 | unknown      | UG16F308P041 | 3 |

|              |         |              |   |
|--------------|---------|--------------|---|
| UG15F235P007 | unknown | UG16F308P055 | 3 |
| UG15F235P007 | unknown | UG16F308P059 | 3 |
| UG15F235P007 | unknown | UG16F308P079 | 3 |
| UG15F233P001 | unknown | UG16F311P013 | 3 |
| UG15F087P016 | unknown | UG16F312P031 | 3 |
| UG15F120P003 | unknown | UG16F313P033 | 3 |
| UG15F120P003 | unknown | UG16F313P061 | 3 |
| UG15F120P003 | unknown | UG16F313P062 | 3 |
| UG15F237P007 | unknown | UG16F315P001 | 3 |
| UG15F237P007 | unknown | UG16F315P005 | 3 |
| UG15F237P007 | unknown | UG16F315P022 | 3 |
| UG15F237P007 | unknown | UG16F315P032 | 3 |
