# Supplementary material for: Identification of Genomic Regions for Traits Associated with Flowering in Cassava (Manihot esculenta Crantz)
Source: MDPI journal article supplement (doi:10.3390/plants13060796), 2024-03-12
Supplement: s1 [file s1]

**Supplementary Table 4:** Associated markers and putative candidate genes in the vicinity of 50 Kbp either side for cassava flowering-associated traits

| Trait                           | Associated SNP ID                                 | Chr. | P.value                | MAF   | R <sup>2</sup> | SNP Effect | PVE (%) | Putative candidate gene ID (Phytozome v13; Manihot 7.1) | Gene functional annotation (according to NCBI)                               |
|---------------------------------|---------------------------------------------------|------|------------------------|-------|----------------|------------|---------|---------------------------------------------------------|------------------------------------------------------------------------------|
| Nodes at 1 <sup>st</sup> branch | S3_21330906<br>(Chromosome03: 21280836..21380869) | 3    | 1.45 ×10 <sup>-7</sup> | 0.017 | 0.106          | 0.82       | 12.94   | Manes.03G102000                                         | dol-P-Man:Man(6)GlcNAc(2)-PP-Dol alpha-1,2-mannosyltransferase               |
|                                 |                                                   |      |                        |       |                |            |         | Manes.03G102100                                         | olee1-like protein                                                           |
|                                 |                                                   |      |                        |       |                |            |         | Manes.03G101900                                         | phosphoenolpyruvate carboxylase                                              |
|                                 |                                                   |      |                        |       |                |            |         | Manes.03G102600                                         | release factor glutamine methyltransferase                                   |
|                                 |                                                   |      |                        |       |                |            |         | Manes.03G102400                                         | TPR repeat-containing thioredoxin TTL1                                       |
|                                 |                                                   |      |                        |       |                |            |         | Manes.03G102200                                         | ubiquitin-conjugating enzyme E2 36                                           |
|                                 |                                                   |      |                        |       |                |            |         | Manes.03G101800                                         | uncharacterized LOC110611895                                                 |
|                                 |                                                   |      |                        |       |                |            |         | Manes.03G102300                                         | uncharacterized LOC110611572                                                 |
|                                 |                                                   |      |                        |       |                |            |         | Manes.03G102500                                         | uncharacterized LOC110611241                                                 |
|                                 | S5_22566689<br>(Chromosome05: 22516670..22616670) | 5    | 5.75 ×10 <sup>-8</sup> | 0.010 | 0.113          | -1.07      | 4.85    | Manes.05G131430                                         | mogroside IE synthase                                                        |
|                                 |                                                   |      |                        |       |                |            |         | Manes.05G131410                                         | mogroside IE synthase-like (LOC122721352), transcript variant X1             |
|                                 |                                                   |      |                        |       |                |            |         | Manes.05G131420                                         | mogroside IE synthase-like (LOC122721259)                                    |
|                                 |                                                   |      |                        |       |                |            |         | Manes.05G131440                                         | probably inactive leucine-rich repeat receptor-like protein kinase At5g48380 |
| Branch type                     | S18_1832353<br>(Chromosome18: 1782341..1882341)   | 18   | 5.6 ×10 <sup>-11</sup> | 0.017 | 0.171          | -1.33      | 11.2    | Manes.18G016372                                         | protein IQ-DOMAIN 32                                                         |
| Branching levels                |                                                   |      | 6.4 ×10 <sup>-12</sup> | 0.017 | 0.195          | 1.29       | 4.84    | Manes.18G016200                                         | cytochrome P450 83B1                                                         |
|                                 |                                                   |      |                        |       |                |            |         | Manes.18G016212                                         | protein RCC2                                                                 |
|                                 |                                                   |      |                        |       |                |            |         | Manes.18G016400                                         | uncharacterized LOC122722385                                                 |
|                                 |                                                   |      |                        |       |                |            |         | Manes.18G016450                                         | uncharacterized LOC122722384                                                 |
|                                 |                                                   |      |                        |       |                |            |         | Manes.18G016500                                         | histone H3.3                                                                 |
|                                 |                                                   |      |                        |       |                |            |         | Manes.18G016700                                         | aldehyde oxidase GLOX                                                        |
|                                 |                                                   |      |                        |       |                |            |         | Manes.18G016725                                         | lysine-specific histone demethylase 1 homolog 3                              |
|                                 |                                                   |      |                        |       |                |            |         | Manes.18G016750                                         | V-type proton ATPase 16 kDa proteolipid subunit                              |
|                                 |                                                   |      |                        |       |                |            |         | Manes.18G016775                                         | vicilin-like seed storage protein At2g28490                                  |
|                                 |                                                   |      |                        |       |                |            |         | Manes.18G016800                                         | lysine-specific histone demethylase 1 homolog 3                              |
|                                 |                                                   |      |                        |       |                |            |         | Manes.18G017000                                         | V-type proton ATPase 16 kDa proteolipid subunit                              |
| Branching                       | S5_29309724<br>(Chromosome05:                     | 5    | 1.12 ×10 <sup>-7</sup> | 0.010 | 0.140          | 1.24       | 17.93   | Manes.05G186300                                         | reticulon-4-interacting protein 1 homolog, mitochondrial                     |

|                                 |                                    |    |                         |       |       |                 |                                                              |                 |                                                                  |
|---------------------------------|------------------------------------|----|-------------------------|-------|-------|-----------------|--------------------------------------------------------------|-----------------|------------------------------------------------------------------|
| Branch type                     | 29259752..29359752)                |    | 3.21 ×10 <sup>-10</sup> | 0.010 | 0.157 | 1.65            | 36.88                                                        | Manes.05G186500 | receptor-like protein kinase 7                                   |
| Branching levels                |                                    |    | 9.70 ×10 <sup>-12</sup> | 0.010 | 0.191 | 1.54            | 31.64                                                        | Manes.05G186400 | xylulose kinase 2                                                |
| Nodes at 1 <sup>st</sup> branch |                                    |    | 5.16 ×10 <sup>-7</sup>  | 0.010 | 0.097 | 0.99            | 20.98                                                        | Manes.05G186600 | sucrose transport protein SUC4                                   |
|                                 |                                    |    |                         |       |       |                 |                                                              | Manes.05G186700 | protein DETOXIFICATION 48                                        |
| Branching                       | S15_11747301                       | 15 | 3.6 ×10 <sup>-7</sup>   | 0.014 | 0.132 | -1.05           | 7.19                                                         | Manes.15G140200 | uncharacterized LOC110601339                                     |
| Branch type                     | (Chromosome15: 11697330..11797330) |    | 1.8 ×10 <sup>-7</sup>   | 0.014 | 0.110 | -1.17           | 12.14                                                        | Manes.15G140300 | non-specific lipid-transfer protein 4.1                          |
| Branching levels                |                                    |    | 4.6 ×10 <sup>-9</sup>   | 0.014 | 0.144 | -1.15           | 11.33                                                        | Manes.15G140400 | protein NRT1/ PTR FAMILY 8.3                                     |
| Nodes at 1 <sup>st</sup> branch |                                    |    | 1.7 ×10 <sup>-11</sup>  | 0.014 | 0.176 | -1.18           | 15.24                                                        | Manes.15G140500 | eukaryotic translation initiation factor 3 subunit I             |
|                                 |                                    |    |                         |       |       |                 |                                                              | Manes.15G140600 | short-chain dehydrogenase reductase ATA1                         |
|                                 |                                    |    |                         |       |       |                 |                                                              | Manes.15G140700 | NADH dehydrogenase [ubiquinone] 1 beta subcomplex subunit 7-like |
|                                 |                                    |    |                         |       |       |                 |                                                              | Manes.15G140900 | myb family transcription factor MOF1                             |
|                                 |                                    |    |                         |       |       |                 |                                                              | Manes.15G141000 | uncharacterized LOC110600802                                     |
|                                 |                                    |    |                         |       |       | Manes.15G141100 | endonuclease V (LOC110601526)                                |                 |                                                                  |
|                                 |                                    |    |                         |       |       | Manes.15G141200 | endonuclease V (LOC110601527)                                |                 |                                                                  |
|                                 |                                    |    |                         |       |       | Manes.15G141300 | protein indeterminate-domain 5, chloroplastic (LOC110600836) |                 |                                                                  |
|                                 |                                    |    |                         |       |       | Manes.15G141400 | protein indeterminate-domain 5, chloroplastic (LOC110602325) |                 |                                                                  |
|                                 |                                    |    |                         |       |       | Manes.15G141500 | protein CHROMATIN REMODELING 19                              |                 |                                                                  |
|                                 |                                    |    |                         |       |       | Manes.15G141700 | transcription factor bHLH111                                 |                 |                                                                  |

Chr., chromosome; MAF, minor allele frequency; PVE, phenotype variance explained; NCBI, National Centre for Biotechnology Information. **Number attached by an underscore on each associated SNP represents its physical position on the chromosome. Numbers in brackets below each SNP show interval of gene search, 50 Kbp up or down the physical position of the SNP. The R<sup>2</sup> value presented in this table is a representation of the regression coefficient of the SNP with the model, which partly contributed to estimation of the PVE**
