# Supplementary material for: Identification of Genomic Regions for Traits Associated with Flowering in Cassava (Manihot esculenta Crantz)
Source: MDPI journal article supplement (doi:10.3390/plants13060796), 2024-03-12
Supplement: s1 [file s1]

**Supplementary Table 3:** Marker-Trait-Associations for Namulonge, Serere and combined data

| Data        | Trait  | SNP          | Chrom | Position | P.value  | maf      | Rsquare without SNP | Rsquare with SNP | effect   | PVE (%)     |
|-------------|--------|--------------|-------|----------|----------|----------|---------------------|------------------|----------|-------------|
| Namulonge   | Branch | S5_29309724  | 5     | 29309724 | 1.78E-07 | 0.01049  | 0.034124296         | 0.133081344      | 4.50678  | 25.73266104 |
| Namulonge   | Branch | S8_39184412  | 8     | 39184412 | 1.64E-07 | 0.024476 | 0.034124296         | 0.133706606      | -3.13219 | 3.39081112  |
| Namulonge   | Branch | S18_597957   | 18    | 597957   | 1.97E-08 | 0.024476 | 0.034124296         | 0.149454668      | -3.29212 | 2.093347497 |
| Namulonge   | Branch | S18_1002380  | 18    | 1002380  | 1.41E-08 | 0.024476 | 0.034124296         | 0.15196802       | -3.34896 | 2.549851553 |
| Namulonge   | Branch | S18_1489472  | 18    | 1489472  | 5.96E-07 | 0.027972 | 0.034124296         | 0.12423185       | -2.74205 | 0           |
| Namulonge   | Branch | S18_1562744  | 18    | 1562744  | 1.08E-09 | 0.020979 | 0.034124296         | 0.171571112      | -3.90107 | 4.160323009 |
| Namulonge   | Branch | S18_1832353  | 18    | 1832353  | 1.16E-07 | 0.017483 | 0.034124296         | 0.136244556      | -3.64257 | 2.427278381 |
| Serere      | Branch | S3_21330906  | 3     | 21330906 | 2.42E-08 | 0.017986 | 0.090089415         | 0.200648371      | 2.782546 | 10.7423347  |
| Serere      | Branch | S3_25142240  | 3     | 25142240 | 6.17E-07 | 0.039568 | 0.090089415         | 0.177345207      | 1.711481 | 4.97448681  |
| Serere      | Branch | S8_38134897  | 8     | 38134897 | 5.38E-08 | 0.05036  | 0.090089415         | 0.194827581      | -1.91966 | 1.742343765 |
| Serere      | Branch | S8_39184412  | 8     | 39184412 | 1.11E-09 | 0.02518  | 0.090089415         | 0.22345769       | -3.08439 | 0.385317179 |
| Serere      | Branch | S11_3127381  | 11    | 3127381  | 5.64E-07 | 0.007194 | 0.090089415         | 0.177985152      | 4.869953 | 2.31E-08    |
| Serere      | Branch | S11_32333764 | 11    | 32333764 | 6.92E-08 | 0.017986 | 0.090089415         | 0.193001439      | 3.233244 | 2.38932066  |
| Serere      | Branch | S16_28288554 | 16    | 28288554 | 4.80E-07 | 0.017986 | 0.090089415         | 0.179130437      | -2.9924  | 0.226962201 |
| Serere      | Branch | S16_28711444 | 16    | 28711444 | 4.80E-07 | 0.017986 | 0.090089415         | 0.179130437      | -2.9924  | 0.000687306 |
| Serere      | Branch | S16_29508150 | 16    | 29508150 | 4.80E-07 | 0.017986 | 0.090089415         | 0.179130437      | -2.9924  | 0.046195133 |
| Serere      | Branch | S18_263746   | 18    | 263746   | 4.86E-09 | 0.05036  | 0.090089415         | 0.212430114      | -2.02129 | 1.183811126 |
| Serere      | Branch | S18_491437   | 18    | 491437   | 8.93E-07 | 0.093525 | 0.090089415         | 0.174731051      | -1.31373 | 1.64E-07    |
| Serere      | Branch | S18_597957   | 18    | 597957   | 1.29E-09 | 0.032374 | 0.090089415         | 0.222301473      | -2.65432 | 0           |
| Serere      | Branch | S18_813314   | 18    | 813314   | 1.81E-06 | 0.071942 | 0.090089415         | 0.169750421      | -1.53369 | 0           |
| Serere      | Branch | S18_1002380  | 18    | 1002380  | 4.16E-12 | 0.02518  | 0.090089415         | 0.26630294       | -3.49152 | 1.025327568 |
| Serere      | Branch | S18_1312039  | 18    | 1312039  | 1.75E-06 | 0.100719 | 0.090089415         | 0.169994607      | -1.26389 | 6.19E-10    |
| Serere      | Branch | S18_1489472  | 18    | 1489472  | 3.73E-11 | 0.02518  | 0.090089415         | 0.249226161      | -3.23686 | 4.73E-09    |
| Serere      | Branch | S18_1562744  | 18    | 1562744  | 7.90E-17 | 0.017986 | 0.090089415         | 0.355381749      | -5.08877 | 22.12003246 |
| Serere      | Branch | S18_1832353  | 18    | 1832353  | 7.13E-10 | 0.014388 | 0.090089415         | 0.226758567      | -3.97799 | 3.67E-09    |
| Serere      | Branch | S18_2456168  | 18    | 2456168  | 2.63E-07 | 0.068345 | 0.090089415         | 0.183409236      | -1.81993 | 2.251915378 |
| CombineData | Branch | S5_29309724  | 5     | 29309724 | 1.12E-07 | 0.010239 | 0.041285936         | 0.140274984      | 1.240582 | 17.93010207 |
| CombineData | Branch | S8_38134897  | 8     | 38134897 | 1.53E-06 | 0.047782 | 0.041285936         | 0.121831802      | -0.58488 | 0.398989652 |
| CombineData | Branch | S8_39184412  | 8     | 39184412 | 1.26E-09 | 0.023891 | 0.041285936         | 0.172970921      | -1.06713 | 1.182168246 |

|             |            |              |    |          |          |          |             |             |          |             |
|-------------|------------|--------------|----|----------|----------|----------|-------------|-------------|----------|-------------|
| CombineData | Branch     | S11_32333764 | 11 | 32333764 | 5.92E-08 | 0.017065 | 0.041285936 | 0.144874059 | 1.113705 | 2.47859136  |
| CombineData | Branch     | S15_11747301 | 15 | 11747301 | 3.59E-07 | 0.013652 | 0.041285936 | 0.132026951 | -1.04514 | 7.194914177 |
| CombineData | Branch     | S16_28288554 | 16 | 28288554 | 4.68E-07 | 0.017065 | 0.041285936 | 0.130147541 | -1.03181 | 1.822947236 |
| CombineData | Branch     | S16_28711444 | 16 | 28711444 | 4.68E-07 | 0.017065 | 0.041285936 | 0.130147541 | -1.03181 | 1.34E-06    |
| CombineData | Branch     | S16_29508150 | 16 | 29508150 | 4.68E-07 | 0.017065 | 0.041285936 | 0.130147541 | -1.03181 | 0.299617592 |
| CombineData | Branch     | S18_263746   | 18 | 263746   | 2.61E-07 | 0.054608 | 0.041285936 | 0.134279564 | -0.58732 | 0.8945882   |
| CombineData | Branch     | S18_597957   | 18 | 597957   | 1.07E-08 | 0.030717 | 0.041285936 | 0.157231074 | -0.86418 | 0           |
| CombineData | Branch     | S18_1002380  | 18 | 1002380  | 1.28E-11 | 0.023891 | 0.041285936 | 0.207678482 | -1.17444 | 1.27E-08    |
| CombineData | Branch     | S18_1489472  | 18 | 1489472  | 2.30E-09 | 0.027304 | 0.041285936 | 0.168557531 | -0.94645 | 7.48E-09    |
| CombineData | Branch     | S18_1562744  | 18 | 1562744  | 2.05E-13 | 0.020478 | 0.041285936 | 0.24001633  | -1.38013 | 2.2808549   |
| CombineData | Branch     | S18_1832353  | 18 | 1832353  | 3.38E-09 | 0.017065 | 0.041285936 | 0.165711636 | -1.17439 | 1.800534468 |
| CombineData | Branch     | S18_2456168  | 18 | 2456168  | 8.58E-07 | 0.068259 | 0.041285936 | 0.125880352 | -0.592   | 0.075619548 |
| Namulonge   | Branch1_No | S5_29309724  | 5  | 29309724 | 3.82E-12 | 0.01049  | 0.026051672 | 0.209487475 | 1.394817 | 43.70949906 |
| Namulonge   | Branch1_No | S13_31910330 | 13 | 31910330 | 5.15E-07 | 0.020979 | 0.026051672 | 0.117977278 | 0.756149 | 9.280509192 |
| Namulonge   | Branch1_No | S18_597957   | 18 | 597957   | 2.24E-06 | 0.024476 | 0.026051672 | 0.107232305 | -0.6086  | 0.646531749 |
| Namulonge   | Branch1_No | S18_1002380  | 18 | 1002380  | 1.89E-06 | 0.024476 | 0.026051672 | 0.108482857 | -0.61366 | 1.279112261 |
| Namulonge   | Branch1_No | S18_1562744  | 18 | 1562744  | 3.04E-07 | 0.020979 | 0.026051672 | 0.121866931 | -0.71473 | 0           |
| Namulonge   | Branch1_No | S18_1832353  | 18 | 1832353  | 1.43E-08 | 0.017483 | 0.026051672 | 0.144772188 | -0.86524 | 8.375812693 |
| Serere      | Branch1_No | S2_16602674  | 2  | 16602674 | 9.32E-08 | 0.028777 | 0.027245342 | 0.134973712 | 2.052093 | 2.573737949 |
| Serere      | Branch1_No | S3_21330906  | 3  | 21330906 | 5.12E-12 | 0.017986 | 0.027245342 | 0.213887519 | 3.342325 | 1.548880719 |
| Serere      | Branch1_No | S3_25142240  | 3  | 25142240 | 1.64E-06 | 0.039568 | 0.027245342 | 0.113159204 | 1.543766 | 0.402337992 |
| Serere      | Branch1_No | S4_15391671  | 4  | 15391671 | 1.22E-07 | 0.028777 | 0.027245342 | 0.132867635 | 2.072178 | 18.0009341  |
| Serere      | Branch1_No | S4_18758385  | 4  | 18758385 | 1.03E-09 | 0.021583 | 0.027245342 | 0.170438063 | 2.757781 | 34.31234855 |
| Serere      | Branch1_No | S8_37096672  | 8  | 37096672 | 1.48E-06 | 0.115108 | 0.027245342 | 0.113929062 | -1.02101 | 0.154676572 |
| Serere      | Branch1_No | S8_39184412  | 8  | 39184412 | 1.23E-08 | 0.02518  | 0.027245342 | 0.150749152 | -2.34841 | 0.293003774 |
| Serere      | Branch1_No | S11_3127381  | 11 | 3127381  | 3.96E-08 | 0.007194 | 0.027245342 | 0.141593923 | 4.135148 | 0.999084194 |
| Serere      | Branch1_No | S13_3899536  | 13 | 3899536  | 5.02E-08 | 0.007194 | 0.027245342 | 0.139756646 | 4.062403 | 0.001496864 |
| Serere      | Branch1_No | S13_3929670  | 13 | 3929670  | 5.02E-08 | 0.007194 | 0.027245342 | 0.139756646 | 4.062403 | 4.303582973 |
| Serere      | Branch1_No | S14_1230231  | 14 | 1230231  | 3.56E-07 | 0.021583 | 0.027245342 | 0.124707166 | -2.57062 | 0           |
| Serere      | Branch1_No | S18_597957   | 18 | 597957   | 9.66E-07 | 0.032374 | 0.027245342 | 0.117143367 | -1.73888 | 2.54E-08    |
| Serere      | Branch1_No | S18_1002380  | 18 | 1002380  | 1.94E-08 | 0.02518  | 0.027245342 | 0.147158573 | -2.27965 | 0           |
| Serere      | Branch1_No | S18_1489472  | 18 | 1489472  | 1.75E-08 | 0.02518  | 0.027245342 | 0.147948557 | -2.31371 | 7.86E-09    |

|             |               |              |    |          |          |          |             |             |          |             |
|-------------|---------------|--------------|----|----------|----------|----------|-------------|-------------|----------|-------------|
| Serere      | Branch1_No    | S18_1562744  | 18 | 1562744  | 2.26E-11 | 0.017986 | 0.027245342 | 0.201511303 | -3.26149 | 0.004287925 |
| Serere      | Branch1_No    | S18_1832353  | 18 | 1832353  | 5.29E-14 | 0.014388 | 0.027245342 | 0.252897055 | -4.09871 | 22.52931446 |
| CombineData | Branch1_No    | S5_29309724  | 5  | 29309724 | 3.22E-10 | 0.010239 | 0.011304348 | 0.157640386 | 1.648382 | 36.88183398 |
| CombineData | Branch1_No    | S8_39184412  | 8  | 39184412 | 5.62E-08 | 0.023891 | 0.011304348 | 0.118509214 | -0.93588 | 0.105452661 |
| CombineData | Branch1_No    | S14_1230231  | 14 | 1230231  | 2.66E-07 | 0.020478 | 0.011304348 | 0.107076025 | -1.0957  | 2.356147613 |
| CombineData | Branch1_No    | S15_11747301 | 15 | 11747301 | 1.80E-07 | 0.013652 | 0.011304348 | 0.109931661 | -1.17217 | 12.13825661 |
| CombineData | Branch1_No    | S18_1002380  | 18 | 1002380  | 4.14E-08 | 0.023891 | 0.011304348 | 0.120778426 | -0.93588 | 0.157317954 |
| CombineData | Branch1_No    | S18_1489472  | 18 | 1489472  | 7.06E-07 | 0.027304 | 0.011304348 | 0.099951815 | -0.79392 | 0           |
| CombineData | Branch1_No    | S18_1562744  | 18 | 1562744  | 3.23E-09 | 0.020478 | 0.011304348 | 0.139967519 | -1.09604 | 0           |
| CombineData | Branch1_No    | S18_1832353  | 18 | 1832353  | 5.62E-11 | 0.017065 | 0.011304348 | 0.171239545 | -1.32908 | 11.21675484 |
| Namulonge   | Branch_Levels | S2_27713636  | 2  | 27713636 | 2.92E-07 | 0.026224 | 0.024810333 | 0.121063793 | -0.73808 | 2.596455472 |
| Namulonge   | Branch_Levels | S5_29309724  | 5  | 29309724 | 3.36E-16 | 0.01049  | 0.024810333 | 0.287212589 | 1.72939  | 44.91028335 |
| Namulonge   | Branch_Levels | S8_39184412  | 8  | 39184412 | 5.01E-10 | 0.024476 | 0.024810333 | 0.169564944 | -0.92904 | 1.417852581 |
| Namulonge   | Branch_Levels | S9_31489987  | 9  | 31489987 | 5.48E-07 | 0.052448 | 0.024810333 | 0.116404878 | -0.52105 | 0.92716512  |
| Namulonge   | Branch_Levels | S15_11747301 | 15 | 11747301 | 2.24E-07 | 0.013986 | 0.024810333 | 0.12301745  | -0.93094 | 9.504693402 |
| Namulonge   | Branch_Levels | S18_597957   | 18 | 597957   | 2.99E-11 | 0.024476 | 0.024810333 | 0.191865371 | -0.96541 | 0           |
| Namulonge   | Branch_Levels | S18_813314   | 18 | 813314   | 4.23E-07 | 0.062937 | 0.024810333 | 0.118306158 | -0.52454 | 0.157051549 |
| Namulonge   | Branch_Levels | S18_1002380  | 18 | 1002380  | 1.81E-11 | 0.024476 | 0.024810333 | 0.195908157 | -0.98883 | 2.871798446 |
| Namulonge   | Branch_Levels | S18_1489472  | 18 | 1489472  | 1.56E-09 | 0.027972 | 0.024810333 | 0.160694072 | -0.81821 | 0           |
| Namulonge   | Branch_Levels | S18_1562744  | 18 | 1562744  | 2.86E-13 | 0.020979 | 0.024810333 | 0.229763908 | -1.16551 | 6.25E-08    |
| Namulonge   | Branch_Levels | S18_1832353  | 18 | 1832353  | 2.33E-10 | 0.017483 | 0.024810333 | 0.175564573 | -1.07842 | 1.81037709  |
| Namulonge   | Branch_Levels | S18_2456168  | 18 | 2456168  | 5.36E-07 | 0.06993  | 0.024810333 | 0.116567214 | -0.51738 | 2.74E-07    |
| Serere      | Branch_Levels | S3_21330906  | 3  | 21330906 | 8.88E-10 | 0.017986 | 0.028147694 | 0.172362702 | 0.555311 | 7.727143488 |
| Serere      | Branch_Levels | S4_18758385  | 4  | 18758385 | 8.35E-08 | 0.021583 | 0.028147694 | 0.136620351 | 0.453587 | 9.290335859 |
| Serere      | Branch_Levels | S8_38134897  | 8  | 38134897 | 2.58E-07 | 0.05036  | 0.028147694 | 0.12796063  | -0.28101 | 3.4441899   |
| Serere      | Branch_Levels | S8_39184412  | 8  | 39184412 | 2.57E-07 | 0.02518  | 0.028147694 | 0.127993272 | -0.39637 | 0           |
| Serere      | Branch_Levels | S11_3127381  | 11 | 3127381  | 6.61E-07 | 0.007194 | 0.028147694 | 0.1208227   | 0.698069 | 0           |
| Serere      | Branch_Levels | S13_3899536  | 13 | 3899536  | 1.49E-06 | 0.007194 | 0.028147694 | 0.114680572 | 0.672835 | 3.2845138   |
| Serere      | Branch_Levels | S13_3929670  | 13 | 3929670  | 1.49E-06 | 0.007194 | 0.028147694 | 0.114680572 | 0.672835 | 13.1497843  |
| Serere      | Branch_Levels | S18_1002380  | 18 | 1002380  | 4.60E-07 | 0.02518  | 0.028147694 | 0.123576602 | -0.38222 | 2.00E-09    |
| Serere      | Branch_Levels | S18_1489472  | 18 | 1489472  | 3.58E-07 | 0.02518  | 0.028147694 | 0.125476527 | -0.39071 | 6.20E-09    |
| Serere      | Branch_Levels | S18_1562744  | 18 | 1562744  | 1.60E-09 | 0.017986 | 0.028147694 | 0.167644673 | -0.54813 | 0.663631965 |

|             |               |              |    |          |          |          |             |             |          |             |
|-------------|---------------|--------------|----|----------|----------|----------|-------------|-------------|----------|-------------|
| Serere      | Branch_Levels | S18_1832353  | 18 | 1832353  | 9.47E-12 | 0.014388 | 0.028147694 | 0.209483726 | -0.69067 | 19.58646122 |
| CombineData | Branch_Levels | S5_29309724  | 5  | 29309724 | 9.70E-12 | 0.010239 | 0.019129801 | 0.191572807 | 1.537258 | 31.64090939 |
| CombineData | Branch_Levels | S8_38134897  | 8  | 38134897 | 1.58E-07 | 0.047782 | 0.019129801 | 0.117911124 | -0.59523 | 0.815391937 |
| CombineData | Branch_Levels | S8_39184412  | 8  | 39184412 | 1.44E-10 | 0.023891 | 0.019129801 | 0.170528825 | -1.0506  | 0.193603102 |
| CombineData | Branch_Levels | S9_31290323  | 9  | 31290323 | 2.18E-06 | 0.03413  | 0.019129801 | 0.09900238  | -0.67435 | 0           |
| CombineData | Branch_Levels | S9_31489987  | 9  | 31489987 | 2.23E-06 | 0.051195 | 0.019129801 | 0.098844431 | -0.53878 | 0.308272181 |
| CombineData | Branch_Levels | S11_3127381  | 11 | 3127381  | 2.15E-06 | 0.010239 | 0.019129801 | 0.099102552 | 1.13153  | 1.067507616 |
| CombineData | Branch_Levels | S14_1230231  | 14 | 1230231  | 4.25E-07 | 0.020478 | 0.019129801 | 0.110732072 | -1.00069 | 1.930112918 |
| CombineData | Branch_Levels | S15_11747301 | 15 | 11747301 | 4.64E-09 | 0.013652 | 0.019129801 | 0.144043522 | -1.15038 | 11.32883332 |
| CombineData | Branch_Levels | S18_597957   | 18 | 597957   | 6.30E-09 | 0.030717 | 0.019129801 | 0.14173972  | -0.81636 | 0.102286928 |
| CombineData | Branch_Levels | S18_1002380  | 18 | 1002380  | 7.79E-12 | 0.023891 | 0.019129801 | 0.193305851 | -1.10345 | 1.647890066 |
| CombineData | Branch_Levels | S18_1489472  | 18 | 1489472  | 7.03E-10 | 0.027304 | 0.019129801 | 0.158331009 | -0.91394 | 0           |
| CombineData | Branch_Levels | S18_1562744  | 18 | 1562744  | 7.93E-14 | 0.020478 | 0.019129801 | 0.23020971  | -1.30755 | 0           |
| CombineData | Branch_Levels | S18_1832353  | 18 | 1832353  | 6.39E-12 | 0.017065 | 0.019129801 | 0.194872308 | -1.28583 | 4.841044264 |
| CombineData | Branch_Levels | S18_2456168  | 18 | 2456168  | 3.28E-07 | 0.068259 | 0.019129801 | 0.112618878 | -0.57597 | 0.111587424 |
| Namulonge   | Branch1_Nodes | S2_15333250  | 2  | 15333250 | 1.70E-06 | 0.027972 | 0.011494807 | 0.095914665 | -1.5865  | 0.54332561  |
| Namulonge   | Branch1_Nodes | S2_27713636  | 2  | 27713636 | 5.49E-08 | 0.026224 | 0.011494807 | 0.121696771 | -1.98425 | 6.824215668 |
| Namulonge   | Branch1_Nodes | S5_29309724  | 5  | 29309724 | 2.21E-11 | 0.01049  | 0.011494807 | 0.183287034 | 3.705906 | 33.37429407 |
| Namulonge   | Branch1_Nodes | S8_39184412  | 8  | 39184412 | 5.65E-07 | 0.024476 | 0.011494807 | 0.104112011 | -1.80455 | 2.25E-07    |
| Namulonge   | Branch1_Nodes | S9_8276994   | 9  | 8276994  | 1.74E-07 | 0.038462 | 0.011494807 | 0.112952828 | 1.641282 | 0.70901025  |
| Namulonge   | Branch1_Nodes | S12_9117572  | 12 | 9117572  | 2.65E-09 | 0.017483 | 0.011494807 | 0.145094243 | -2.52579 | 13.14257273 |
| Namulonge   | Branch1_Nodes | S14_1230231  | 14 | 1230231  | 6.34E-07 | 0.020979 | 0.011494807 | 0.103252312 | -2.22504 | 1.356125483 |
| Namulonge   | Branch1_Nodes | S15_11747301 | 15 | 11747301 | 2.02E-11 | 0.013986 | 0.011494807 | 0.184002066 | -3.21623 | 12.96773119 |
| Namulonge   | Branch1_Nodes | S18_597957   | 18 | 597957   | 3.44E-07 | 0.024476 | 0.011494807 | 0.107819456 | -1.82009 | 2.72E-07    |
| Namulonge   | Branch1_Nodes | S18_1002380  | 18 | 1002380  | 2.86E-07 | 0.024476 | 0.011494807 | 0.109206412 | -1.83431 | 6.66E-05    |
| Namulonge   | Branch1_Nodes | S18_1562744  | 18 | 1562744  | 3.51E-08 | 0.020979 | 0.011494807 | 0.125117617 | -2.13685 | 3.13E-07    |
| Namulonge   | Branch1_Nodes | S18_1832353  | 18 | 1832353  | 1.50E-09 | 0.017483 | 0.011494807 | 0.149546247 | -2.56162 | 2.507672965 |
| Serere      | Branch1_Nodes | S1_24720107  | 1  | 24720107 | 6.48E-07 | 0.010791 | 0.032995319 | 0.125362661 | -2.57412 | 3.526363745 |
| Serere      | Branch1_Nodes | S2_16602674  | 2  | 16602674 | 4.80E-10 | 0.028777 | 0.032995319 | 0.181409882 | 2.067939 | 3.144503806 |
| Serere      | Branch1_Nodes | S3_21330906  | 3  | 21330906 | 3.37E-15 | 0.017986 | 0.032995319 | 0.281332345 | 3.313648 | 6.3779189   |
| Serere      | Branch1_Nodes | S3_25142240  | 3  | 25142240 | 5.17E-08 | 0.039568 | 0.032995319 | 0.144613887 | 1.509473 | 0.202692414 |
| Serere      | Branch1_Nodes | S4_6193028   | 4  | 6193028  | 6.84E-07 | 0.010791 | 0.032995319 | 0.124950203 | 2.58666  | 2.450684184 |

|             |               |              |    |          |          |          |             |             |          |             |
|-------------|---------------|--------------|----|----------|----------|----------|-------------|-------------|----------|-------------|
| Serere      | Branch1_Nodes | S4_15391671  | 4  | 15391671 | 8.05E-10 | 0.028777 | 0.032995319 | 0.177269599 | 2.079253 | 6.112979435 |
| Serere      | Branch1_Nodes | S4_18758385  | 4  | 18758385 | 2.28E-12 | 0.021583 | 0.032995319 | 0.225306934 | 2.745775 | 19.07339948 |
| Serere      | Branch1_Nodes | S5_22566689  | 5  | 22566689 | 7.31E-08 | 0.010791 | 0.032995319 | 0.141943704 | -2.77254 | 4.329653592 |
| Serere      | Branch1_Nodes | S10_26312279 | 10 | 26312279 | 3.70E-07 | 0.010791 | 0.032995319 | 0.129583508 | 2.627104 | 3.491960521 |
| Serere      | Branch1_Nodes | S11_3127381  | 11 | 3127381  | 8.53E-11 | 0.007194 | 0.032995319 | 0.195373142 | 4.175304 | 12.94470182 |
| Serere      | Branch1_Nodes | S13_3899536  | 13 | 3899536  | 5.00E-10 | 0.007194 | 0.032995319 | 0.181092882 | 3.999875 | 4.736657495 |
| Serere      | Branch1_Nodes | S13_3926842  | 13 | 3926842  | 7.01E-07 | 0.010791 | 0.032995319 | 0.124764065 | 2.590522 | 5.85E-07    |
| Serere      | Branch1_Nodes | S13_3929670  | 13 | 3929670  | 5.00E-10 | 0.007194 | 0.032995319 | 0.181092882 | 3.999875 | 4.132706196 |
| Serere      | Branch1_Nodes | S14_964612   | 14 | 964612   | 9.58E-08 | 0.010791 | 0.032995319 | 0.139871951 | -2.77925 | 5.47E-08    |
| Serere      | Branch1_Nodes | S14_1209616  | 14 | 1209616  | 9.58E-08 | 0.010791 | 0.032995319 | 0.139871951 | -2.77925 | 9.72E-08    |
| Serere      | Branch1_Nodes | S14_1230231  | 14 | 1230231  | 3.43E-10 | 0.021583 | 0.032995319 | 0.18411978  | -2.72276 | 4.04E-08    |
| Serere      | Branch1_Nodes | S14_1653289  | 14 | 1653289  | 9.58E-08 | 0.010791 | 0.032995319 | 0.139871951 | -2.77925 | 2.83E-07    |
| Serere      | Branch1_Nodes | S14_2247549  | 14 | 2247549  | 9.58E-08 | 0.010791 | 0.032995319 | 0.139871951 | -2.77925 | 0           |
| Serere      | Branch1_Nodes | S14_3759369  | 14 | 3759369  | 9.58E-08 | 0.010791 | 0.032995319 | 0.139871951 | -2.77925 | 3.27E-08    |
| Serere      | Branch1_Nodes | S15_11747301 | 15 | 11747301 | 2.10E-06 | 0.014388 | 0.032995319 | 0.116550407 | -2.13686 | 1.73669633  |
| Serere      | Branch1_Nodes | S16_3062172  | 16 | 3062172  | 2.22E-06 | 0.014388 | 0.032995319 | 0.116140593 | -2.11112 | 1.584945026 |
| Serere      | Branch1_Nodes | S16_27842042 | 16 | 27842042 | 2.10E-07 | 0.010791 | 0.032995319 | 0.133891552 | -2.66842 | 3.313827688 |
| Serere      | Branch1_Nodes | S18_9295397  | 18 | 9295397  | 3.20E-07 | 0.079137 | 0.032995319 | 0.1306885   | -1.1186  | 0           |
| CombineData | Branch1_Nodes | S3_21330906  | 3  | 21330906 | 1.45E-07 | 0.017065 | 0.005607584 | 0.106371161 | 0.81666  | 12.93879494 |
| CombineData | Branch1_Nodes | S5_22566689  | 5  | 22566689 | 5.75E-08 | 0.010239 | 0.005607584 | 0.11326397  | -1.06798 | 4.845146622 |
| CombineData | Branch1_Nodes | S5_29309724  | 5  | 29309724 | 5.16E-07 | 0.010239 | 0.005607584 | 0.097060368 | 0.994939 | 20.98497522 |
| CombineData | Branch1_Nodes | S8_39184412  | 8  | 39184412 | 6.61E-07 | 0.023891 | 0.005607584 | 0.095254701 | -0.65689 | 0           |
| CombineData | Branch1_Nodes | S9_8276994   | 9  | 8276994  | 5.00E-07 | 0.037543 | 0.005607584 | 0.097288611 | 0.574125 | 0.267967021 |
| CombineData | Branch1_Nodes | S11_3127381  | 11 | 3127381  | 1.23E-07 | 0.010239 | 0.005607584 | 0.107640226 | 1.051692 | 2.251685411 |
| CombineData | Branch1_Nodes | S14_964612   | 14 | 964612   | 1.53E-07 | 0.010239 | 0.005607584 | 0.106014049 | -1.04697 | 0.084190779 |
| CombineData | Branch1_Nodes | S14_1209616  | 14 | 1209616  | 1.53E-07 | 0.010239 | 0.005607584 | 0.106014049 | -1.04697 | 0.01209467  |
| CombineData | Branch1_Nodes | S14_1230231  | 14 | 1230231  | 7.73E-11 | 0.020478 | 0.005607584 | 0.163951908 | -1.08049 | 1.606297091 |
| CombineData | Branch1_Nodes | S14_1653289  | 14 | 1653289  | 1.53E-07 | 0.010239 | 0.005607584 | 0.106014049 | -1.04697 | 0.773141397 |
| CombineData | Branch1_Nodes | S14_2247549  | 14 | 2247549  | 1.53E-07 | 0.010239 | 0.005607584 | 0.106014049 | -1.04697 | 5.27E-07    |
| CombineData | Branch1_Nodes | S14_3759369  | 14 | 3759369  | 1.53E-07 | 0.010239 | 0.005607584 | 0.106014049 | -1.04697 | 0.002412489 |
| CombineData | Branch1_Nodes | S15_11747301 | 15 | 11747301 | 1.65E-11 | 0.013652 | 0.005607584 | 0.176178485 | -1.17828 | 15.23808294 |
| CombineData | Branch1_Nodes | S18_1002380  | 18 | 1002380  | 6.93E-07 | 0.023891 | 0.005607584 | 0.094902853 | -0.64814 | 0           |

|             |               |             |    |         |          |          |             |             |          |          |
|-------------|---------------|-------------|----|---------|----------|----------|-------------|-------------|----------|----------|
| CombineData | Branch1_Nodes | S18_1562744 | 18 | 1562744 | 7.50E-08 | 0.020478 | 0.005607584 | 0.111286995 | -0.76154 | 1.29E-08 |
| CombineData | Branch1_Nodes | S18_1832353 | 18 | 1832353 | 3.01E-09 | 0.017065 | 0.005607584 | 0.135545918 | -0.91801 | 0        |

Chrom, chromosome; maf, minor allele frequency; PVE, phenotype variance explained. Highlighted rows show MTAs with  $PVE \geq 4\%$ , and the rows heighted in green show MTAs common in the two locations. The 'Rsquare with SNP' value is a regression coefficient of the model with SNP, while the 'Rsquare without SNP' value is a regression coefficient of the model without SNP, both contribute to estimation of the PVE.
