# Supplementary material for: Identification of Genomic Regions for Traits Associated with Flowering in Cassava (Manihot esculenta Crantz)
Source: MDPI journal article supplement (doi:10.3390/plants13060796), 2024-03-12
Supplement: s1 [file s1]

**Supplementary Table 2: Marker-trait associations for flowering-associated traits of 293 cassava accessions**

| <b>Trait</b>                          | <b>No. of MTA</b> | <b>Chromosome</b> | <b>Associated SNP marker ID</b>                                                         |
|---------------------------------------|-------------------|-------------------|-----------------------------------------------------------------------------------------|
| Branching                             | 15                | 5 (01)            | S5_29309724                                                                             |
|                                       |                   | 8 (02)            | S8_38134897; S8_39184412                                                                |
|                                       |                   | 11 (01)           | S11_32333764                                                                            |
|                                       |                   | 15 (01)           | S15_11747301                                                                            |
|                                       |                   | 16 (03)           | S16_28288554; S16_28711444; S16_29508150                                                |
|                                       |                   | 18 (07)           | S18_263746; S18_597957; S18_1002380; S18_1489472; S18_1562744; S18_1832353; S18_2456168 |
| Branch type                           | 08                | 5 (01)            | S5_29309724                                                                             |
|                                       |                   | 8 (01)            | S8_39184412                                                                             |
|                                       |                   | 14 (01)           | S14_1230231                                                                             |
|                                       |                   | 15 (01)           | S15_11747301                                                                            |
|                                       |                   | 18 (04)           | S18_1002380; S18_1489472; S18_1562744; S18_1832353                                      |
| Branching levels                      | 14                | 5 (01)            | S5_29309724                                                                             |
|                                       |                   | 8 (02)            | S8_38134897; S8_39184412                                                                |
|                                       |                   | 9 (02)            | S9_31290323; S9_31489987                                                                |
|                                       |                   | 11 (01)           | S11_3127381                                                                             |
|                                       |                   | 14 (01)           | S14_1230231                                                                             |
|                                       |                   | 15 (01)           | S15_11747301                                                                            |
|                                       |                   | 18 (06)           | S18_597957; S18_1002380; S18_1489472; S18_1562744; S18_1832353; S18_2456168             |
| Nodes at 1 <sup>st</sup> branch       | 16                | 3 (01)            | S3_21330906                                                                             |
|                                       |                   | 5 (02)            | S5_22566689; S5_29309724                                                                |
|                                       |                   | 8 (01)            | S8_39184412                                                                             |
|                                       |                   | 9 (01)            | S9_8276994                                                                              |
|                                       |                   | 11 (01)           | S11_3127381                                                                             |
|                                       |                   | 14 (06)           | S14_964612; S14_1209616; S14_1230231; S14_1653289; S14_2247549; S14_3759369             |
|                                       |                   | 15 (01)           | S15_11747301                                                                            |
|                                       |                   | 18 (03)           | S18_1002380; S18_1562744; S18_1832353                                                   |
| Stem height at 1 <sup>st</sup> branch | -                 | -                 | -                                                                                       |

MTA = marker-trait association, number in brackets shows number of MTA on the chromosome
